# Supplementary material for: Uncovering natural variation in root system architecture and growth dynamics using a robotics-assisted phenomics platform
Source: eLife journal article supplement (doi:10.7554/elife.76968), 2022-09-01

# Average angle

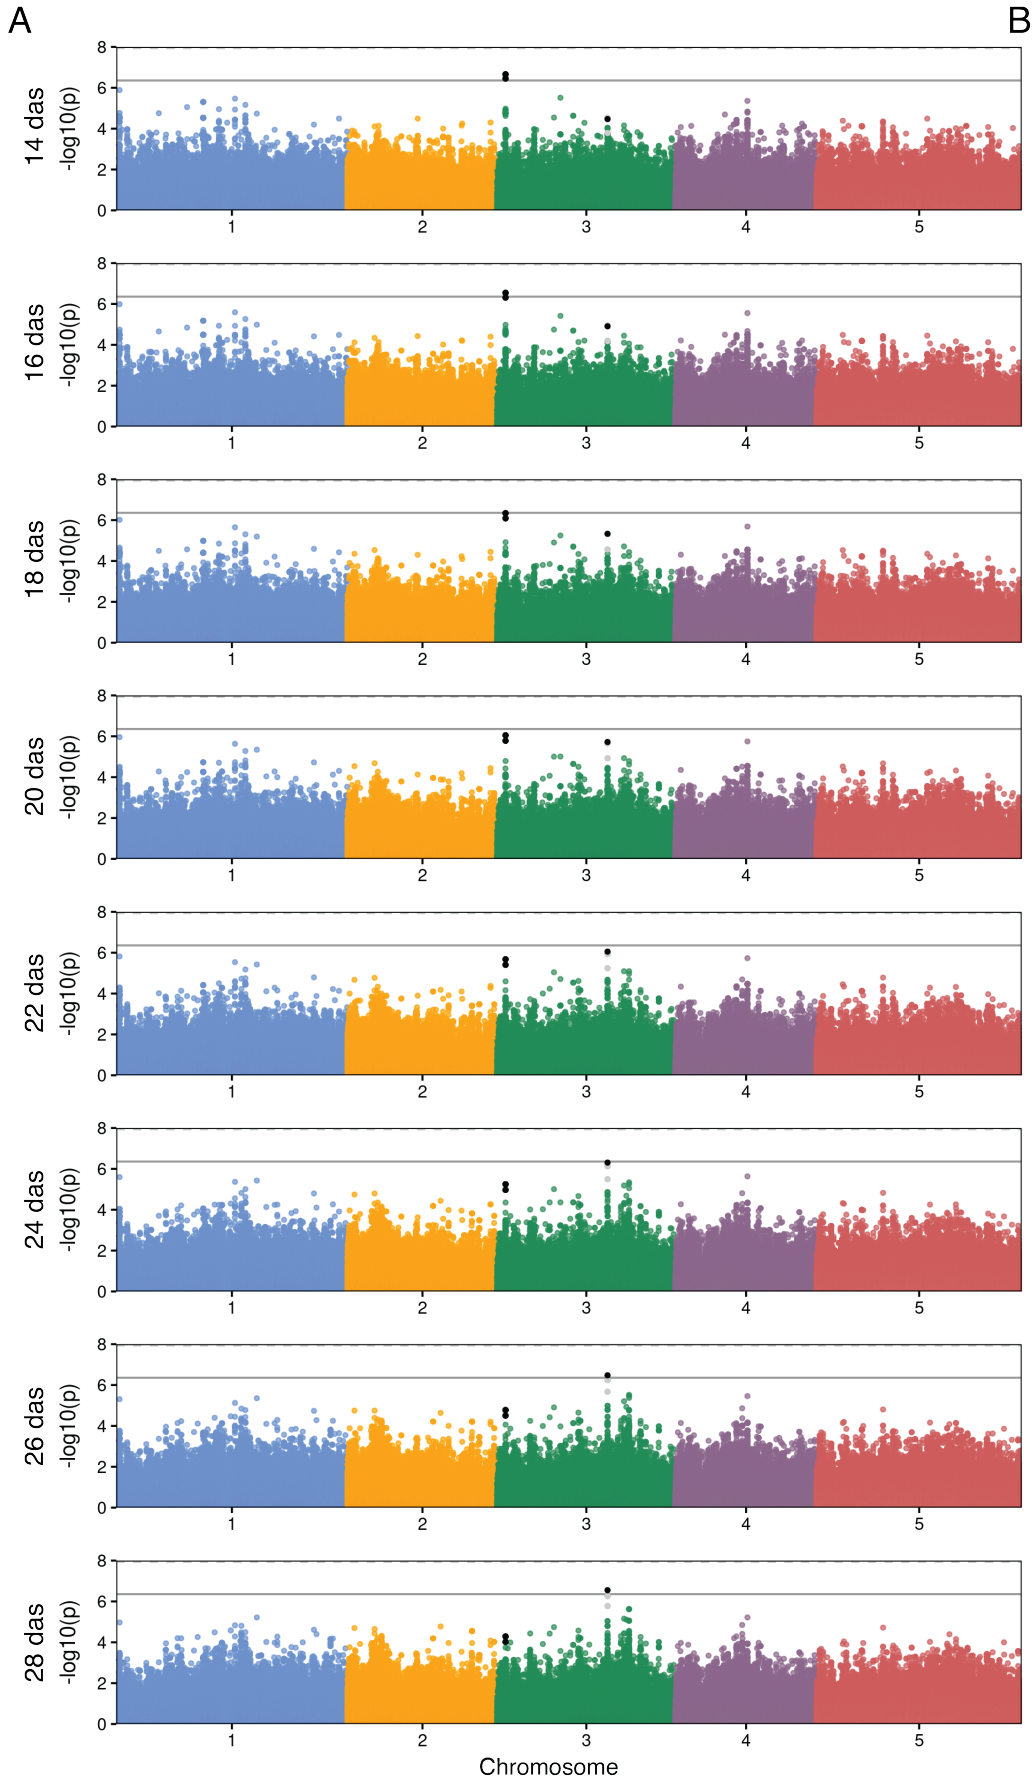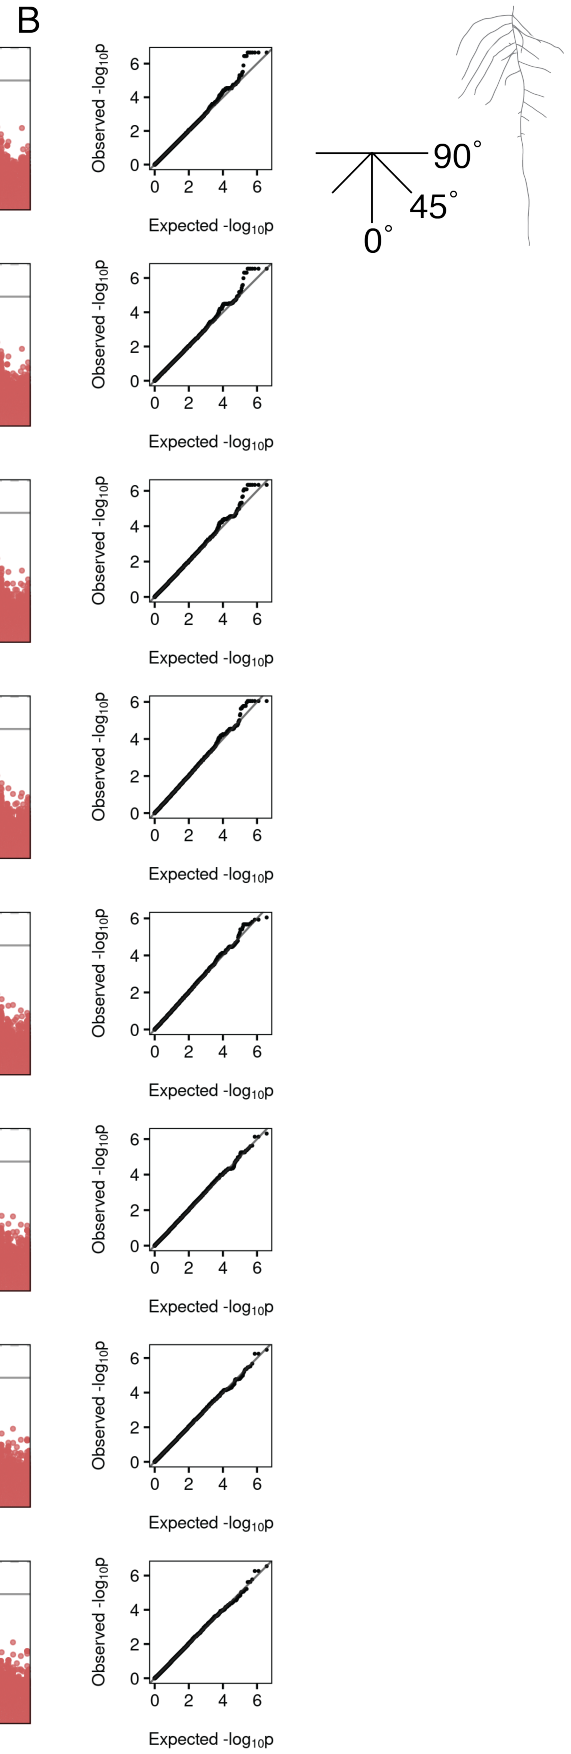





# Convexhull

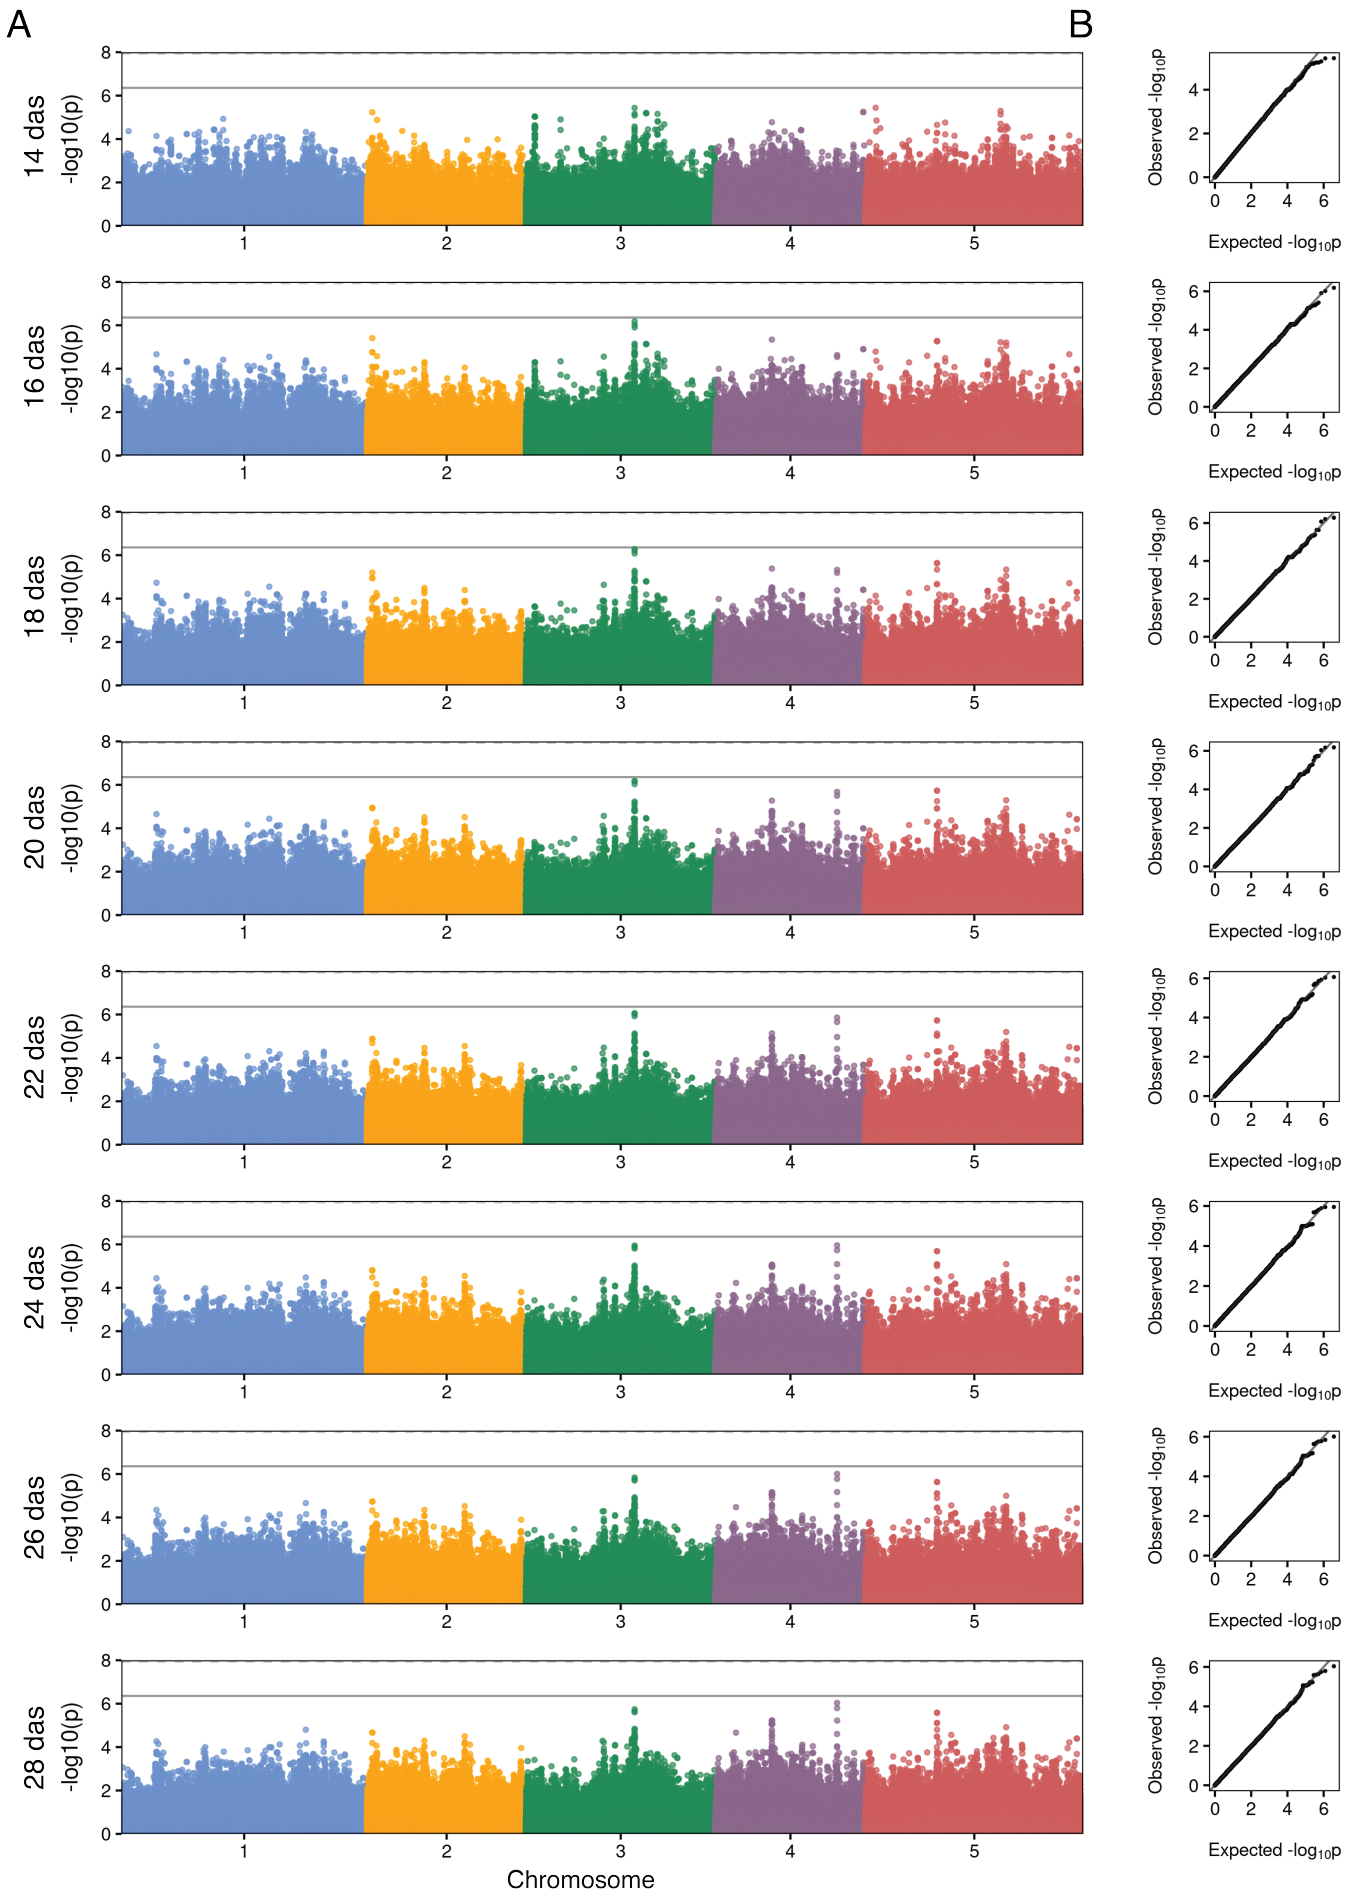

# Depth

**A**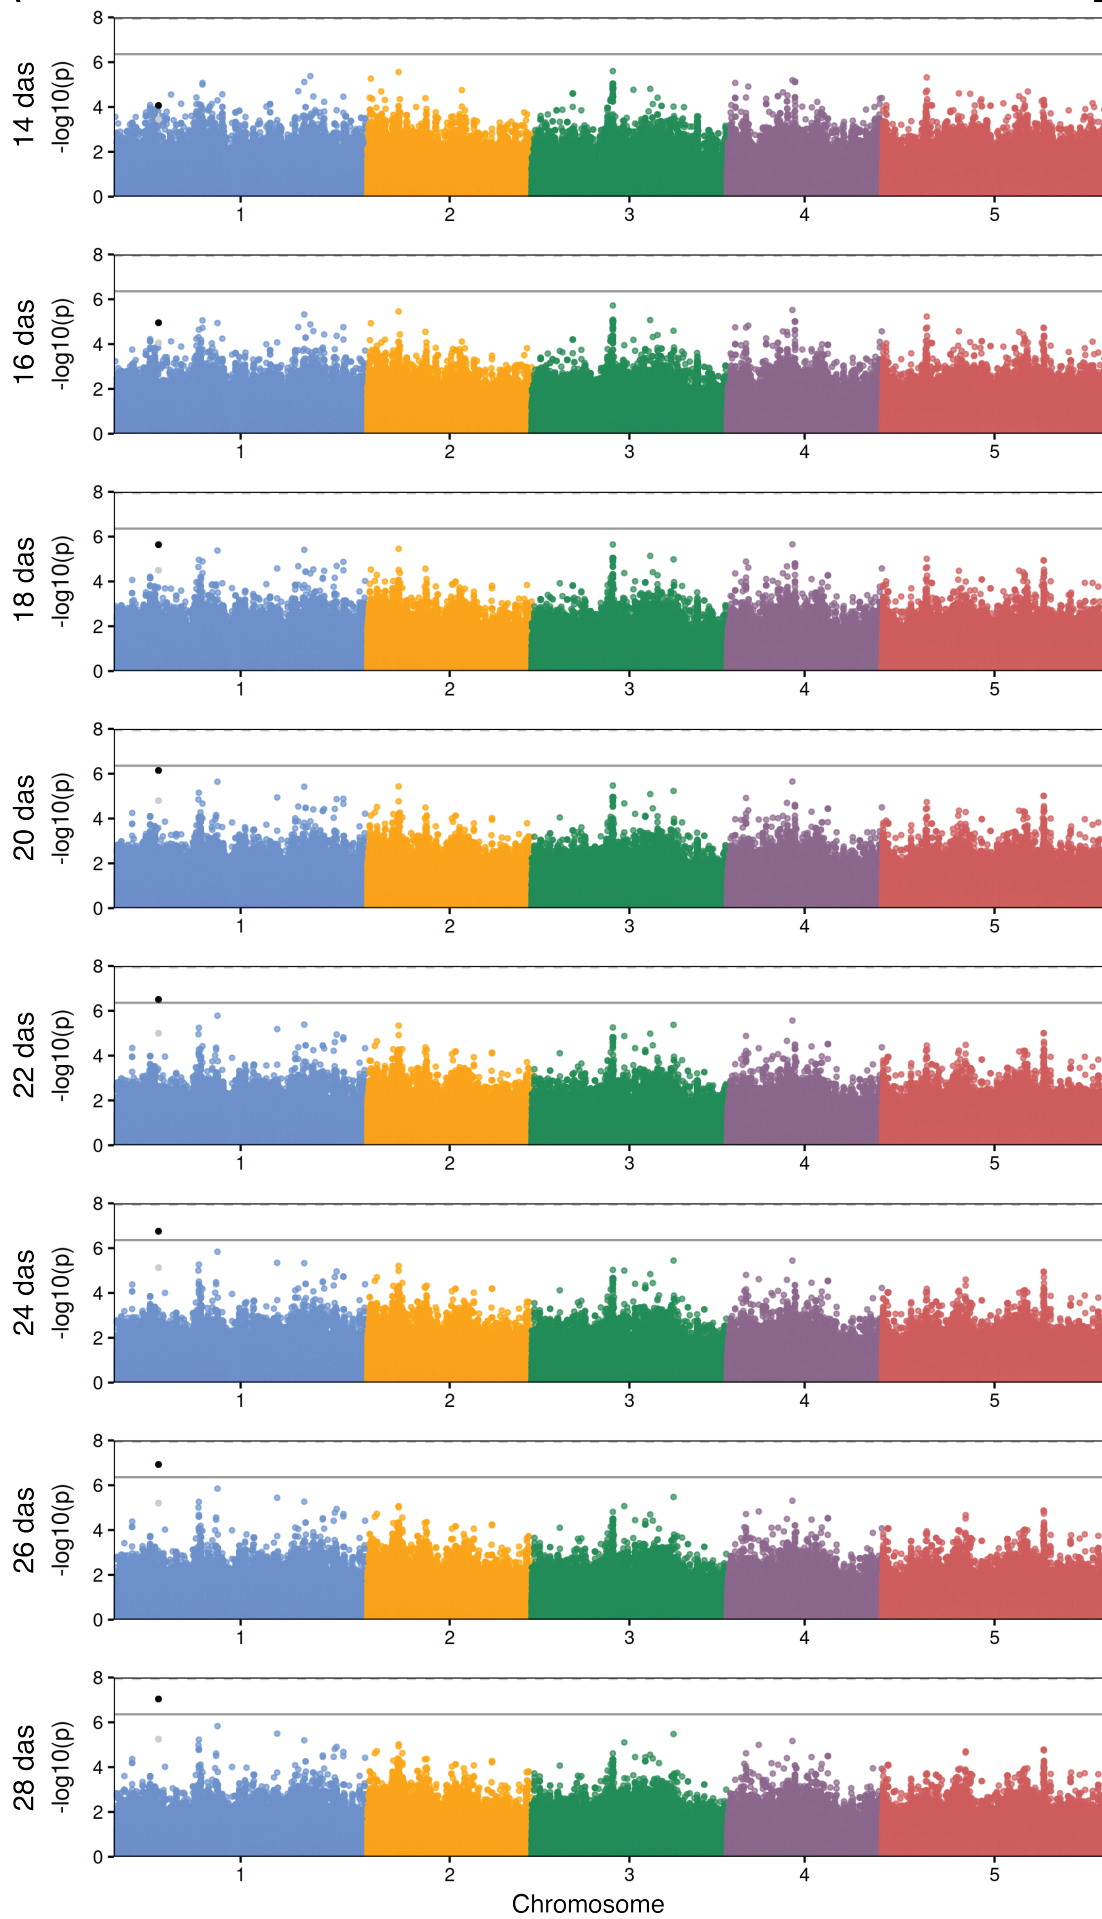**B**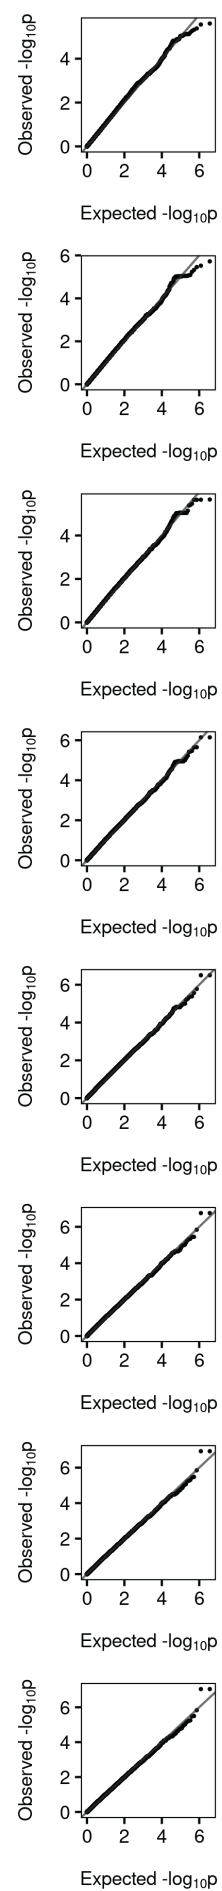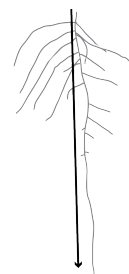

# Depth to width ratio

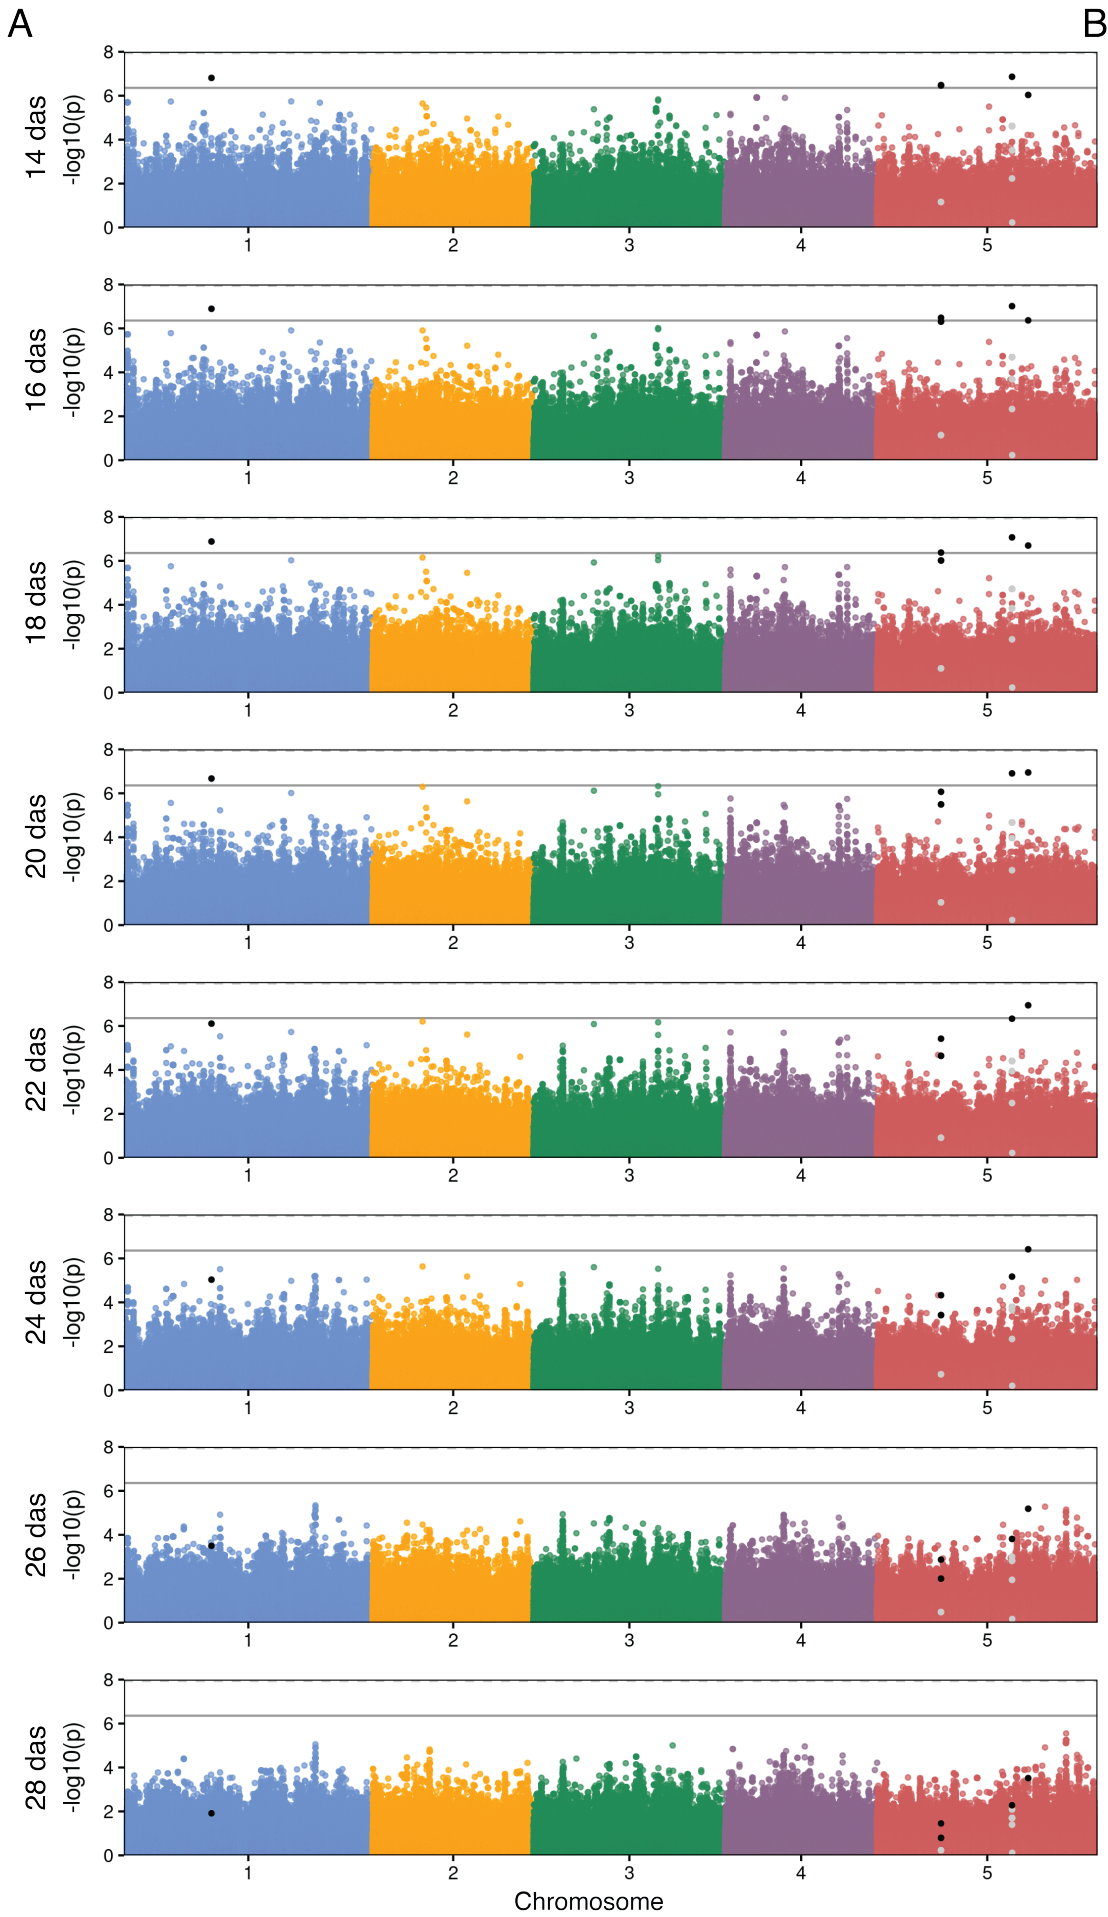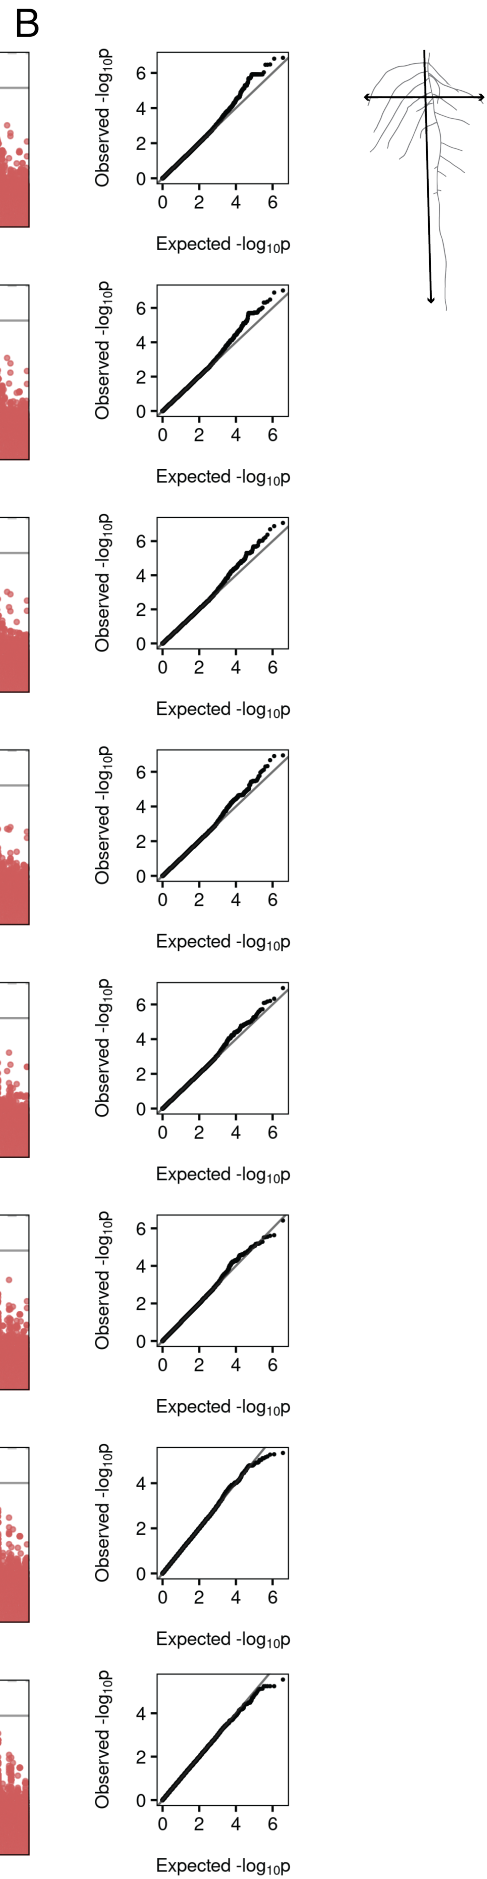



# Length per day

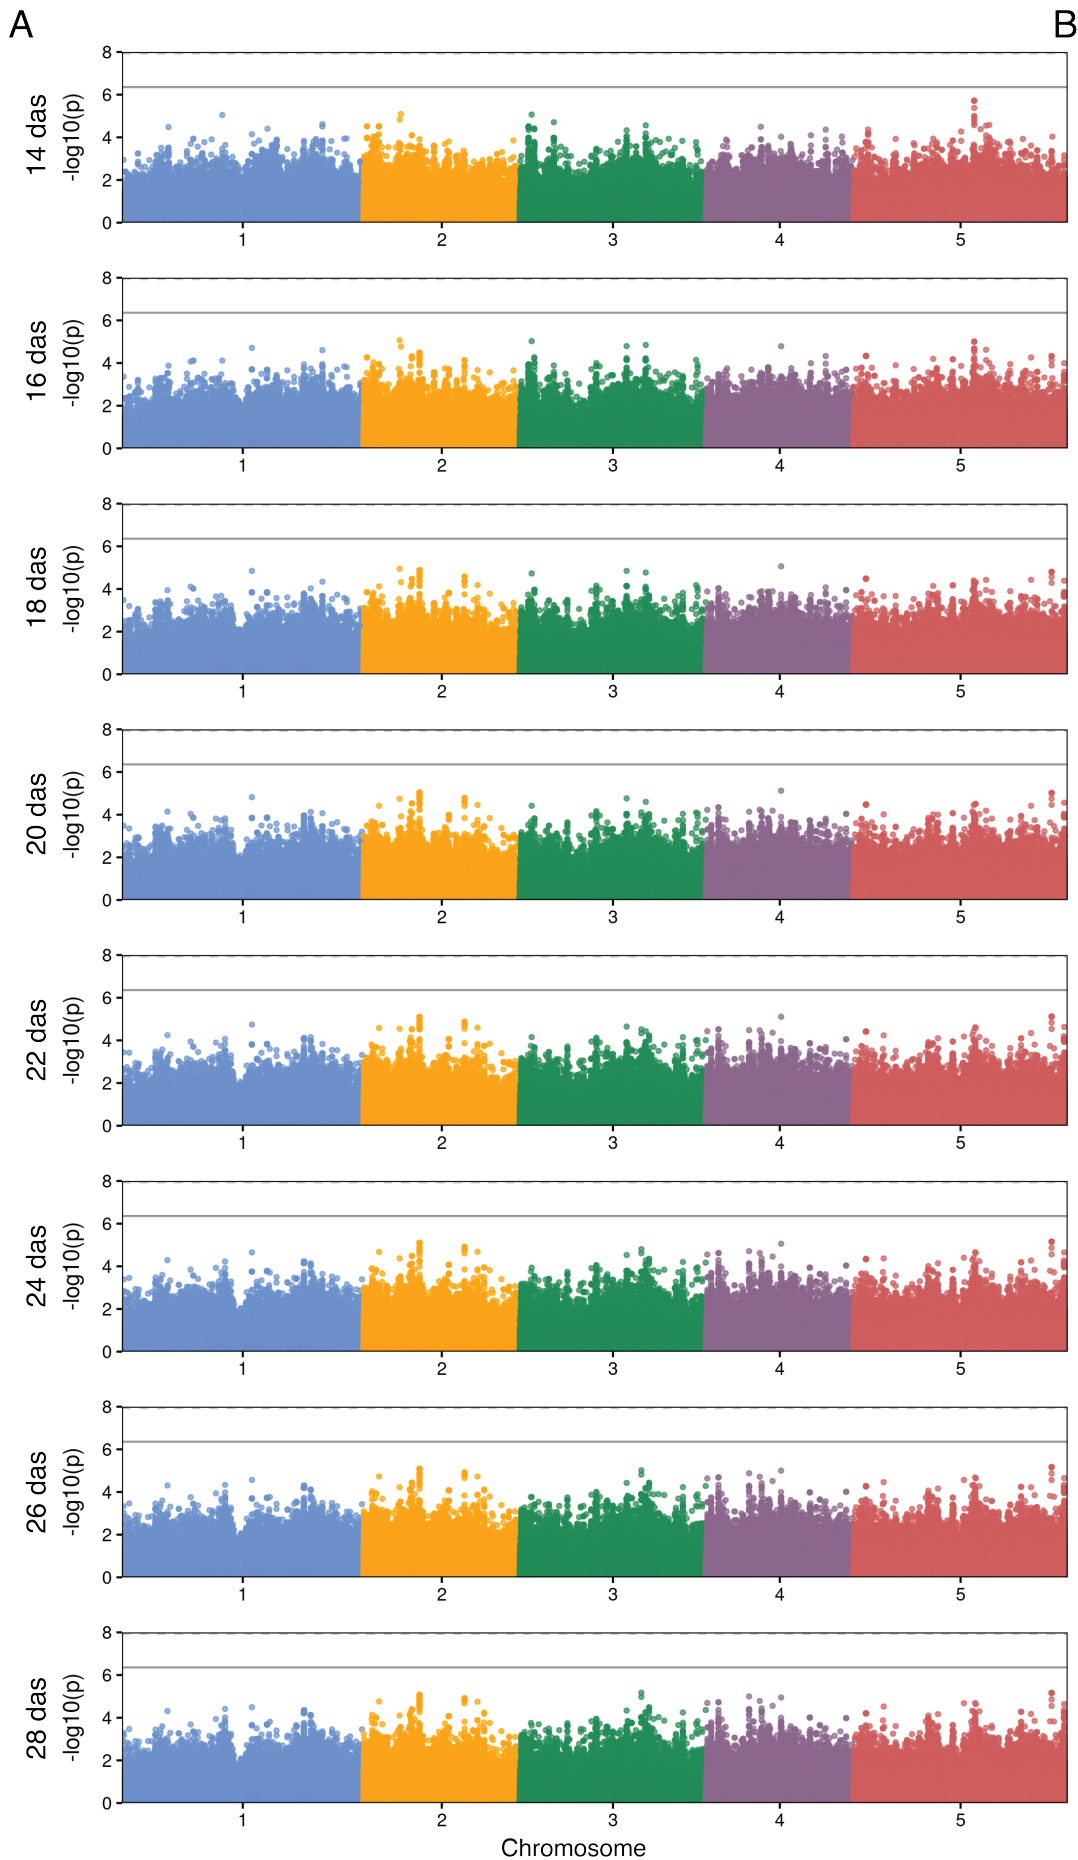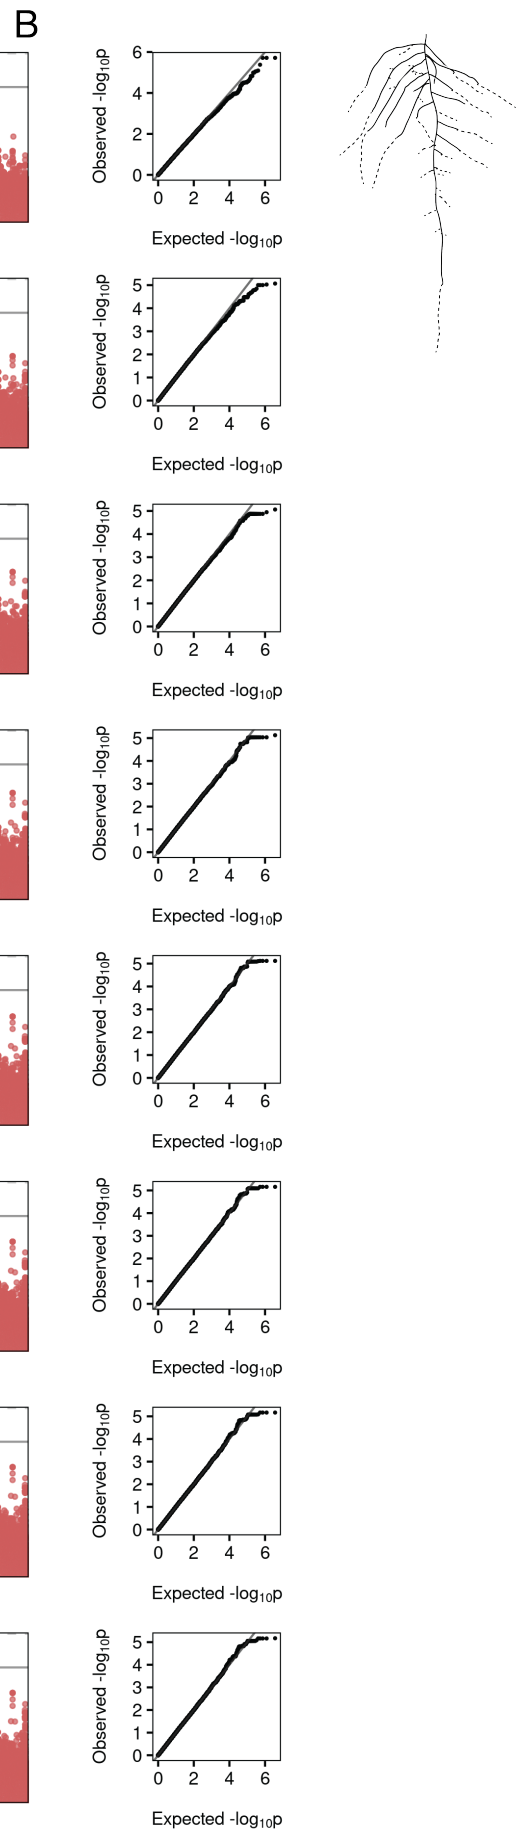



# Total length

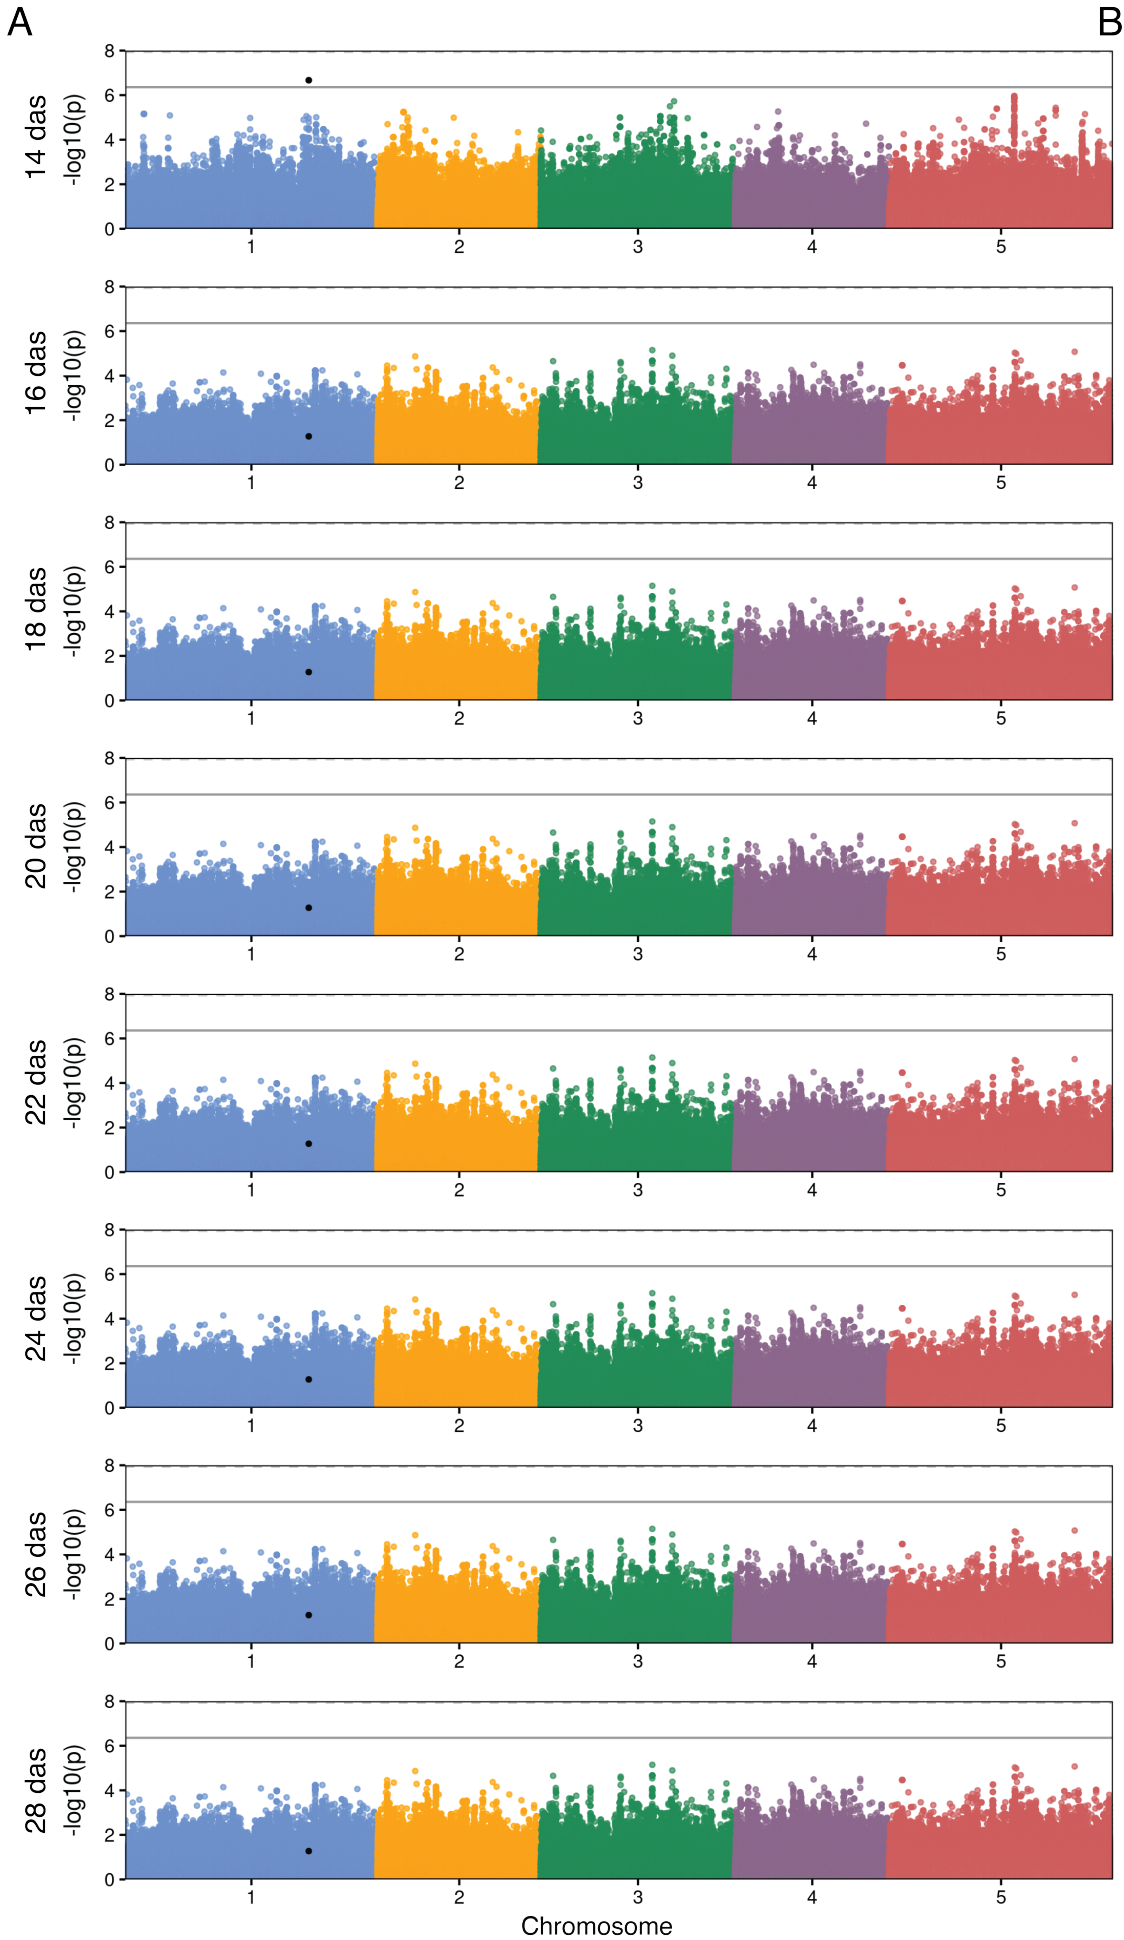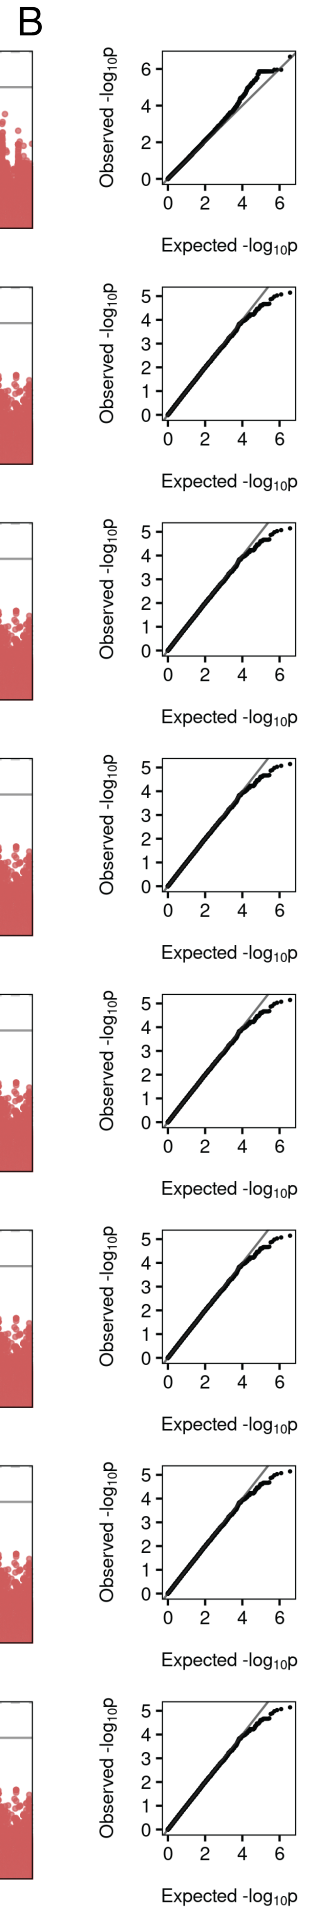

# Width

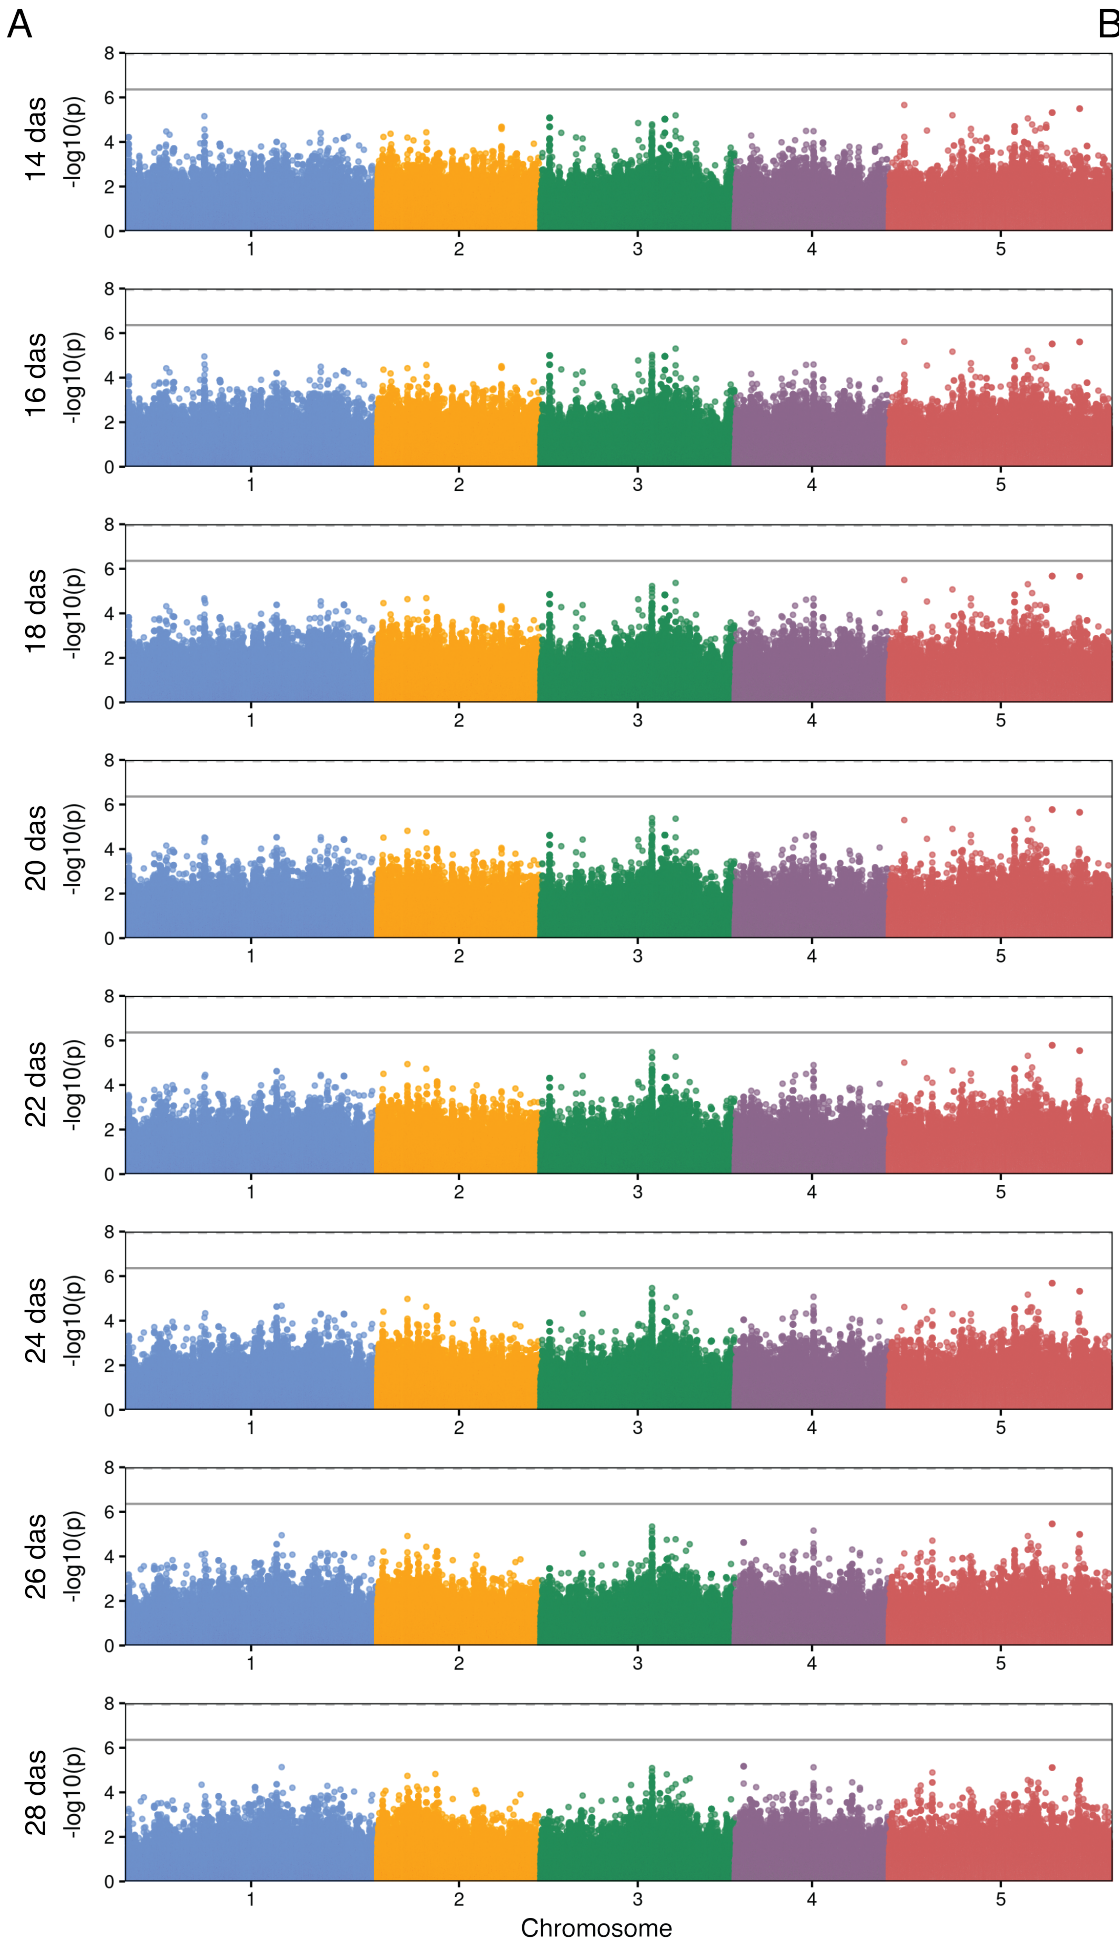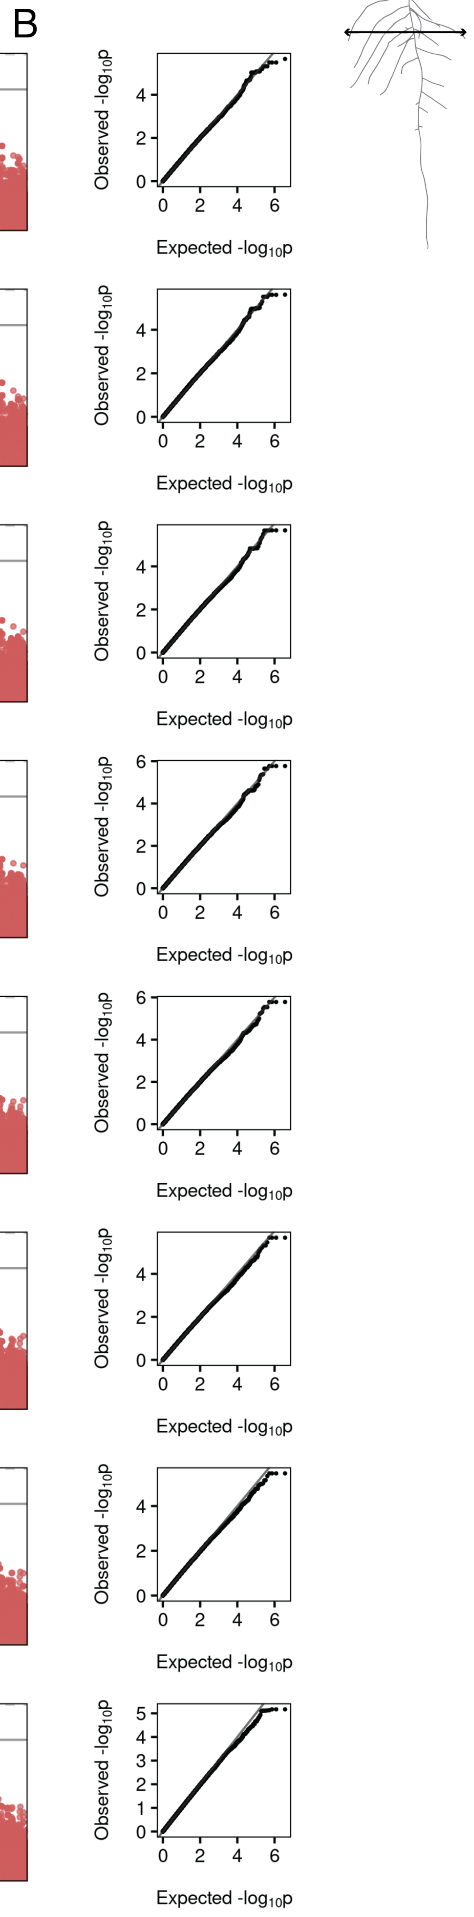

# Y-center

## A

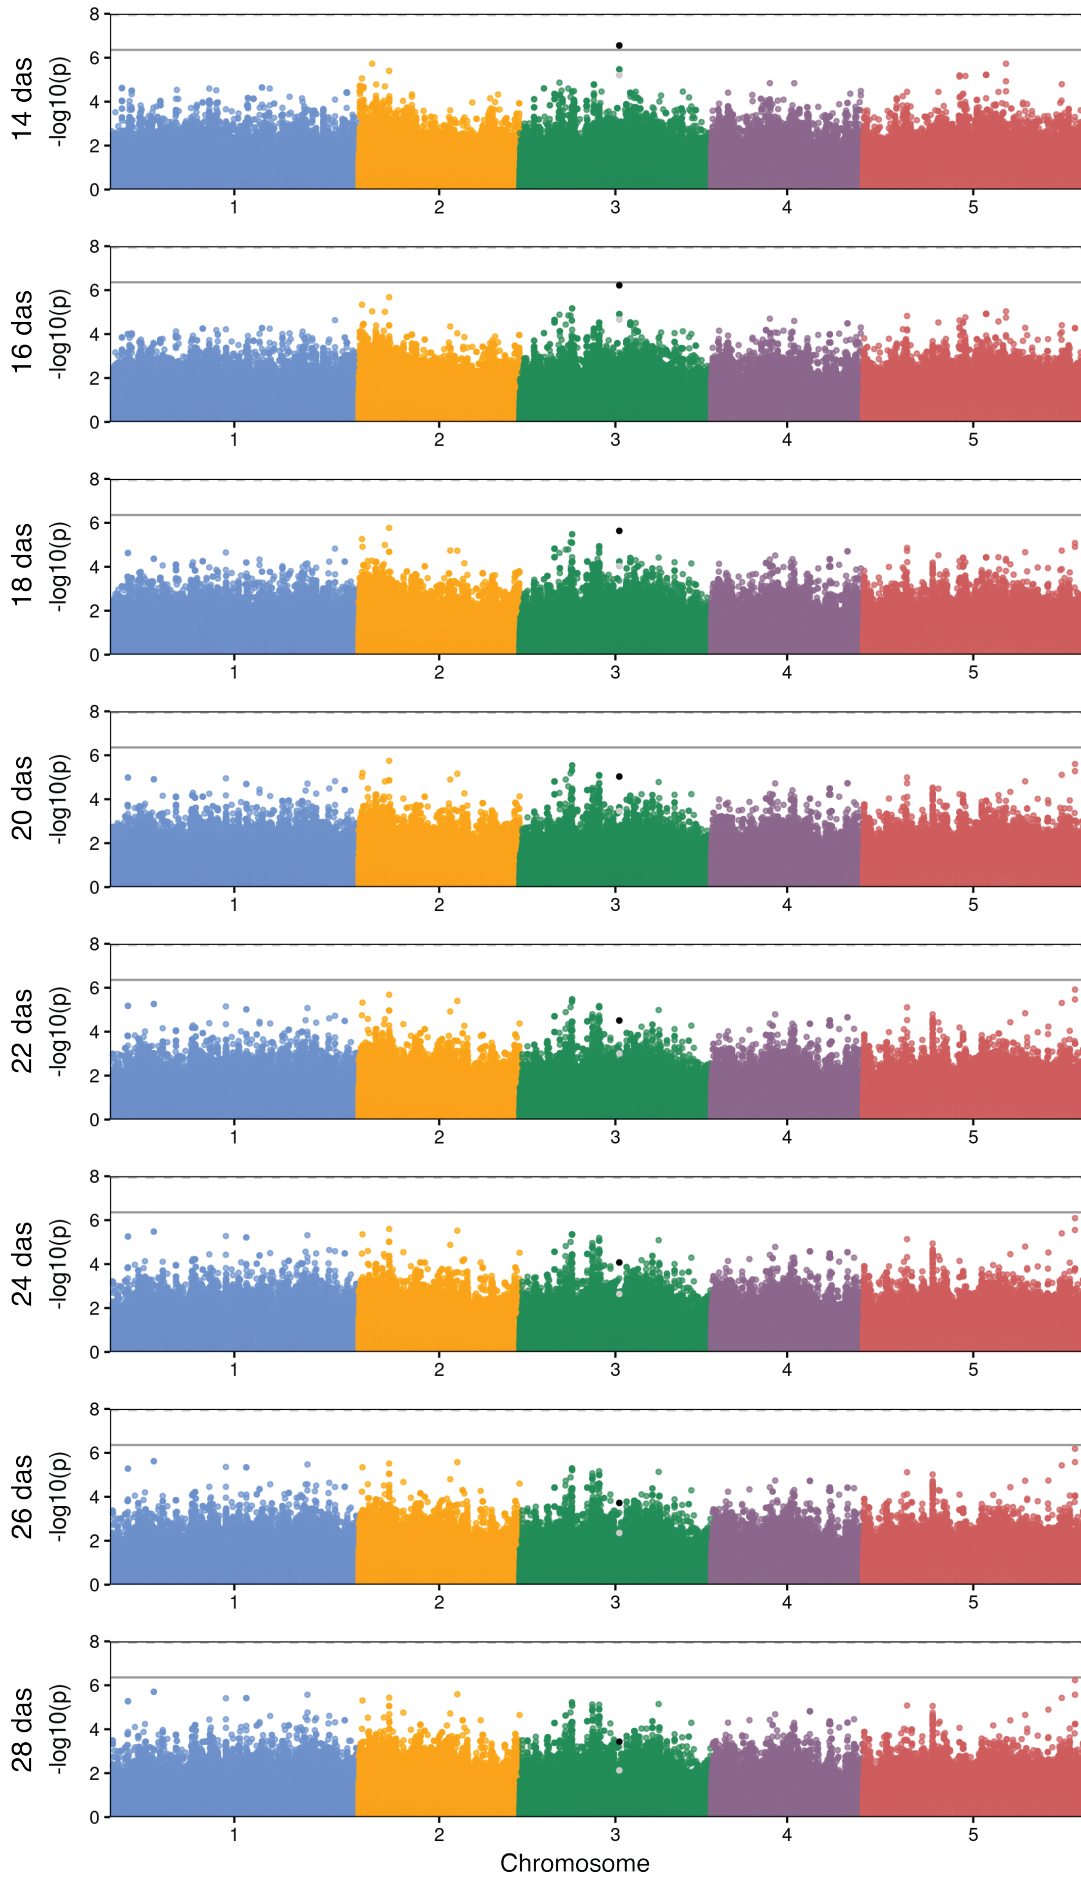

## B

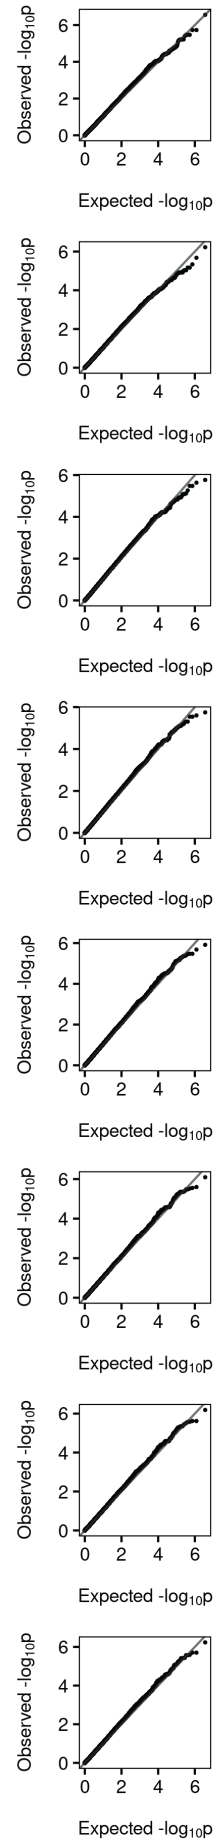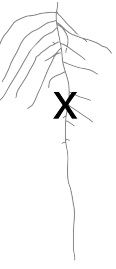

C

## Average angle

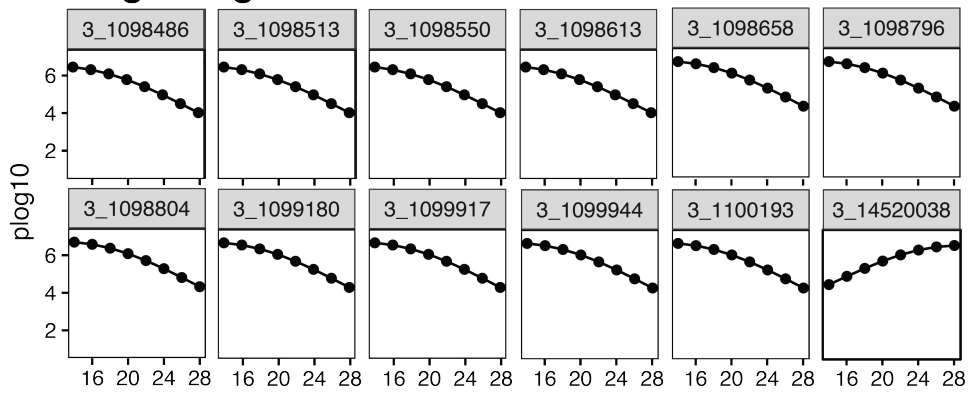

## Average angle per day

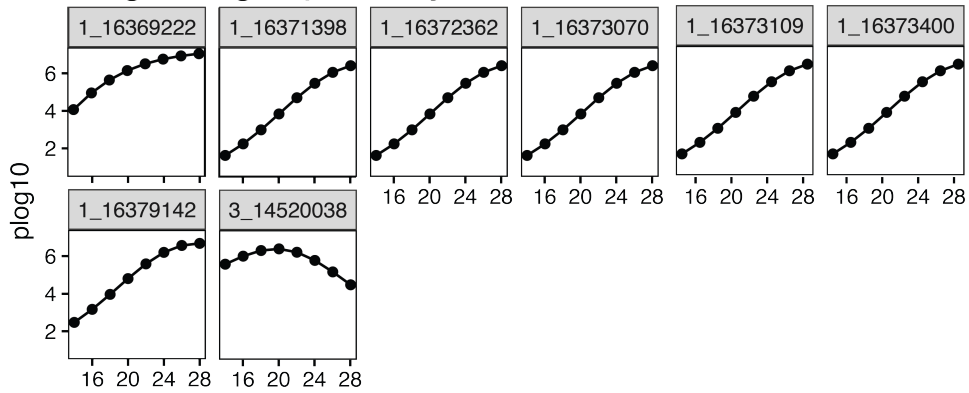

## Depth

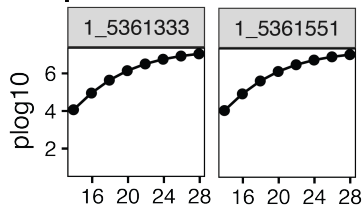

## Depth to width ratio

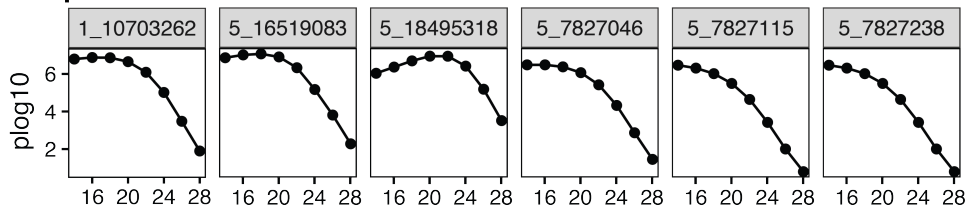

## Total length

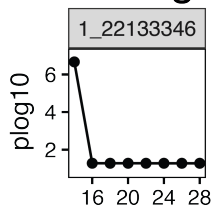

## Y-center

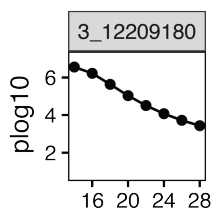

Supplement: supp [file elife-76968-supp-v1.zip]
