# Supplementary material for: Uncovering natural variation in root system architecture and growth dynamics using a robotics-assisted phenomics platform
Source: eLife. 2022 Sep 1;11:e76968. doi: 10.7554/eLife.76968 (PMC9499532; doi:10.7554/eLife.76968)
Supplement: Supplementary file 1. [file elife-76968-supp1.xlsx]

## Sheet: Sheet1
Trait	Units	Description
Depth	cm	Deepest point identified in root image
Width	cm	Left most point detected in root image subtracted from right most point
Convexhull	cm2	Area within bounding polygon
Average angle	Degrees (˚)	Length-weighted average angle with respect to gravity of the entire root system such that 0 is straight down and 90 is straight out to the side
Average angle per day	Degrees (˚)	Length-weighted average angle with respect to gravity of only new growth on a given day
Total length	cm	Sum of lengths of all root segments
Length per day	cm	Sum of all lengths of new growth root segments on a given day
Depth to width ratio	-	Root depth divided by root width
Y-center	cm	Vertical centered location of root mass
