# Supplementary material for: Uncovering natural variation in root system architecture and growth dynamics using a robotics-assisted phenomics platform
Source: eLife. 2022 Sep 1;11:e76968. doi: 10.7554/eLife.76968 (PMC9499532; doi:10.7554/eLife.76968)
Supplement: Supplementary file 3. [file elife-76968-supp3.xlsx]

## Sheet: Tabellenblatt1
Accession	background noise	replicate with no root system	delayed root growth	other anomalies
Adal1
Adal3
Ale-Stenar-64-24		GWA 2
App1-12
Ba1		GWA 4, 6
Ba1-2		GWA 4
Ba5-1
Bro1-6	GWA 4
Coc1-IP
Col-0
Dr10	GWA 1
Dra2-1	GWA 1, 3
Eden2
Eds-1
Fei-0
Fj1-2		GWA 2
Fj2-4	GWA 1, 3, 5
Fri2
Ge-0	GWA 1
Grn-12
Gro-3
Had1		GWA 4
Hag2
Ham1
Hel3
HolA1-1	GWA 3
Hov1-10
Hovdala-2
In-0	GWA 1
Kal1
Kas-2	GWA 1,5	GWA 2
Kia1
Kil-0		GWA 1
Kor3
Kulturen-1	GWA 1
Kz-9
Lan1
Ler1	GWA 1, 4
Liarum	GWA 1,3
Lis2
Lom1-1
Lu-1	GWA 1
Lv-5
Neo-6
Ode2	GWA 1
Omn-5
Omo1-7
Or-1	GWA 4
Oy-0
Pi2	GWA 1
Rak1	GWA 1, 3, 5
Rd17-319	GWA 1
Rev1	GWA 1
San2	GWA 1
SanMartin
SantaClara
Sev				2 root systems: GWA 3, 6
Spr1-2	GWA 1
Spro1		GWA 6
Sr-3	GWA 1, 3
Ste-2	GWA 4
T1020	GWA 4
T1040
T460
T690
T800
TAA04		GWA 6
TAA14
Tad01
Tal03	GWA 1
TB01
TDr-18
TDr-2	GWA 4
TEDEN3
TGR01
THO-08	GWA 4,5
Ting-1	GWA 5	GWA 1
TOM04	GWA 5
Tomegap2	GWA 1, 3, 4, 5
Tottarp2
Tra01
Tsu-0
Tur4		GWA 3
Ty-0	GWA 5
Ull3-4
UllA1		GWA 5
Var-2-6	GWA 1			RS not centered: GWA 4
Vastervik	GWA 5
Vimmerby
Vislv
Wei-0
Yst-1
Zal1	GWA 4			RS not centered: GWA 4
Bay-0	HL06_R002		HL06_R003, HL06_R004
Col-0	HL06_R007		HL06_R007	HL06_R009: 2 root systems?
Est-1	HL06_R015, HL15_R011, HL15_R015		HL06_R012
Sha	HL06_R046, R047, R048, HL015_R017			HL06_R020: RS not centered
Tottarp2				HL11_R023: incomplete RS, HL11_R025: 2 root systems?
Tsu-1	HL06_R058, HL15_R030
