# Supplementary material for: Uncovering natural variation in root system architecture and growth dynamics using a robotics-assisted phenomics platform
Source: eLife. 2022 Sep 1;11:e76968. doi: 10.7554/eLife.76968 (PMC9499532; doi:10.7554/eLife.76968)
Supplement: Supplementary file 5. [file elife-76968-supp5.xlsx]

## Sheet: Sheet1
Trait	Heritability
Average angle	0.454211
Average angle per day	0.306298
Depth to width	0.285691
Width	0.278713
Y-center	0.116584
Depth	0.109606
Length per image	0.0786777
Convexhull	0.0661828
Total Length	1.19e-05
*[1] 1001 Genomes identifier, [2] RegMap identifier, [3] Busch identifier
