# Supplementary material for: Uncovering natural variation in root system architecture and growth dynamics using a robotics-assisted phenomics platform
Source: eLife. 2022 Sep 1;11:e76968. doi: 10.7554/eLife.76968 (PMC9499532; doi:10.7554/eLife.76968)
Supplement: Supplementary file 6. [file elife-76968-supp6.xlsx]

## Sheet: Sheet1
Removed images for GLO-RIAv2 analysis
GWA1-R053-2017-08-27-1756-C_remove.tif
GWA1-R073-2017-08-31-1941-C_remove.tif
GWA2-R089-2017-09-15-1331-C_remove.tif
GWA3-R039-2017-10-08-2205-C_remove.tif
GWA3-R055-2017-10-07-1302-C_remove.tif
GWA3-R062-2017-10-09-1620-C_remove.tif
GWA3-R096-2017-10-11-1029-C_remove.tif
GWA4-R024-2017-10-22-2221-C_remove.tif
GWA4-R044-2017-10-22-2235-C_remove.tif
GWA4-R060-2017-10-27-1605-C_remove.tif
GWA4-R062-2017-10-23-1826-C_remove.tif
GWA4-R090-2017-10-29-1247-C_remove.tif
GWA4-R092-2017-11-04-1528-C_remove.tif
GWA4-R095-2017-10-22-1618-C_remove.tif
GWA4-R096-2017-10-25-0944-C_remove.tif
GWA5-R003-2017-11-23-1458-C_remove.tif
GWA5-R007-2017-11-26-1827-C_remove.tif
GWA5-R015-2017-11-27-1858-C_remove.tif
GWA5-R016-2017-11-28-1936-C_remove.tif
GWA5-R018-2017-11-25-1106-C_remove.tif
GWA5-R030-2017-11-29-1633-C_remove.tif
GWA5-R031-2017-11-29-1311-C_remove.tif
GWA5-R036-2017-11-27-2120-C_remove.tif
GWA5-R038-2017-11-28-0331-C_remove.tif
GWA5-R039-2017-11-29-1618-C_remove.tif
GWA5-R053-2017-11-28-0845-C_remove.tif
GWA5-R056-2017-11-26-1914-C_remove.tif
GWA5-R065-2017-11-22-1727-C_remove.tif
GWA5-R067-2017-11-28-1320-C_remove.tif
GWA5-R075-2017-11-30-0826-C_remove.tif
GWA5-R077-2017-11-26-1535-C_remove.tif
GWA5-R083-2017-11-26-1408-C_remove.tif
GWA5-R085-2017-11-28-2059-C_remove.tif
GWA5-R089-2017-11-22-1330-C_remove.tif
